# Supplementary material for: MeltingPlot, a user-friendly online tool for epidemiological investigation using High Resolution Melting data
Source: PubMed Central journal article supplement (PMC7891011; doi:10.1186/s12859-021-04020-y), 2021-02-18
Supplement: 12859_2021_4020_MOESM1_ESM.pdf [file 12859_2021_4020_MOESM1_ESM.pdf]

# MeltingPlot, a user-friendly online tool for epidemiological investigation using High Resolution Melting data

Matteo Perini<sup>1</sup>, Gherard Batisti Biffignandi<sup>2</sup>, Domenico Di Carlo<sup>1</sup>, Ajay Ratan Pasala<sup>1</sup>, Aurora Piazza<sup>2</sup>, Simona Panelli<sup>1</sup>, Gian Vincenzo Zuccotti<sup>1,3</sup>, and Francesco Comandatore<sup>1,\*</sup>

<sup>1</sup>Department of Biomedical and Clinical Sciences “L. Sacco”, University of Milan, Pediatric Clinical Research Center “Romeo and Enrica Invernizzi”, Milan, 20157, Italy; <sup>2</sup>Department of Clinical, Surgical, Diagnostic and Pediatric Sciences, University of Pavia, Pavia, 27100, Italia; <sup>3</sup>Department of Pediatrics, Children’s Hospital Vittore Buzzi, University of Milan, Italy;

\*Corresponding author. email: [francesco.comandatore@unimi.it](mailto:francesco.comandatore@unimi.it)

## SUPPLEMENTARY MATERIAL

|                                        |           |
|----------------------------------------|-----------|
| <b>Clustering algorithm</b>            | <b>2</b>  |
| <b>Input file</b>                      | <b>3</b>  |
| <b>Output files</b>                    | <b>5</b>  |
| HRM-based clustering/typing            | 6         |
| 1a) Isolates graph                     | 6         |
| 1b) Isolates heatmap                   | 7         |
| Prevalence analysis                    | 8         |
| 2a) Isolates location (daily)          | 8         |
| 2b) Isolates location (monthly)        | 9         |
| 2c) Positivizations location (daily)   | 10        |
| 2d) Positivizations location (monthly) | 11        |
| 2e) Positivizations global (daily)     | 12        |
| 2f) Positivizations global (monthly)   | 13        |
| Transmission analysis                  | 14        |
| 3a) Patients timeline                  | 14        |
| 3b) Patient-to-patient graph           | 15        |
| Tabular outputs                        | 16        |
| Isolates cluster table                 | 16        |
| Isolates cluster and patients table    | 17        |
| <b>References</b>                      | <b>18</b> |

# Clustering algorithm

The isolates are clustered by a graph-based method. First, the average melting temperature (aTm) is computed as the arithmetic mean of the technical replicates. Each isolate will be represented by  $n$  aTms, where  $n$  is the number of PCR primer sets used in the HRM typing protocol. Then, the isolate graph is built connecting two isolates when each of the  $n$  aTms of the two isolates do not range above  $0.5^{\circ}\text{C}$  (aTm difference  $\leq 0.5^{\circ}\text{C}$ , a threshold established in Perini et al. 2020 [1]). Subsequently, the graph is decomposed in separate components and for each component the community structure is detected by the Girvan–Newman algorithm [2] implemented in the “cluster\_edge\_betweenness” function ([https://igraph.org/r/doc/cluster\\_edge\\_betweenness.html](https://igraph.org/r/doc/cluster_edge_betweenness.html)) of the R library igraph [3]. The algorithm measures the centrality of the vertices in the graph: a vertex that connects two distinct clusters will have a higher betweenness value. The “cluster\_edge\_betweenness” function performs a hierarchical clustering based on these values, clustering together the communities of vertices connected with low betweenness values. These communities will represent the HRM-based isolate clusters. Furthermore, a betweenness value is assigned to each vertex and a edge betweenness value is assigned to each edge by the “betweenness” and the “edge\_betweenness” functions of igraph (<https://igraph.org/r/doc/betweenness.html>). These values are represented in the isolate graph as vertex size (smaller vertex = higher betweenness value) and edge thickness (thinner edge = higher edge betweenness value). Moreover, when a vertex has a normalized betweenness value above 0.5 it is not assigned to any cluster and it is classified as “undetermined” by the tool. The betweenness values are also reported in the tabular outputs. The normalized betweenness threshold can be set by the user.

# Input file

|    | A                 | B                  | C         | D         | E         | F | G | H | I | J | K | L | M |
|----|-------------------|--------------------|-----------|-----------|-----------|---|---|---|---|---|---|---|---|
| 1  | <b>ID_isolate</b> | <b>Primers_set</b> | <b>T1</b> | <b>T2</b> | <b>T3</b> |   |   |   |   |   |   |   |   |
| 2  | Is01              | wzi-3              | 84        | 84        | 84        |   |   |   |   |   |   |   |   |
| 3  | Is01              | wzi-4              | 84        | 84        | 84        |   |   |   |   |   |   |   |   |
| 4  | Is10              | wzi-3              | 84        | 84        | 84        |   |   |   |   |   |   |   |   |
| 5  | Is10              | wzi-4              | 82.5      | 82.5      | 82.5      |   |   |   |   |   |   |   |   |
| 6  | Is05              | wzi-3              | 83        | 82        | 82        |   |   |   |   |   |   |   |   |
| 7  | Is05              | wzi-4              | 84        | 85        | 85        |   |   |   |   |   |   |   |   |
| 8  | Is11              | wzi-3              | 84        | 84        | 84        |   |   |   |   |   |   |   |   |
| 9  | Is11              | wzi-4              | 82.5      | 82.5      | 82.5      |   |   |   |   |   |   |   |   |
| 10 | Is12              | wzi-3              | 84        | 84        | 84        |   |   |   |   |   |   |   |   |
| 11 | Is12              | wzi-4              | 84        | 84        | 84        |   |   |   |   |   |   |   |   |
| 12 | Is13              | wzi-3              | 84        | 84        | 84        |   |   |   |   |   |   |   |   |
| 13 | Is13              | wzi-4              | 84        | 84        | 84        |   |   |   |   |   |   |   |   |
| 14 | Is14              | wzi-3              | 84        | 84        | 84        |   |   |   |   |   |   |   |   |
| 15 | Is14              | wzi-4              | 84        | 84        | 84        |   |   |   |   |   |   |   |   |
| 16 | Is15              | wzi-3              | 84        | 84        | 84        |   |   |   |   |   |   |   |   |
| 17 | Is15              | wzi-4              | 82.5      | 82.5      | 82.5      |   |   |   |   |   |   |   |   |
| 18 | Is16              | wzi-3              | 84        | 84        | 84        |   |   |   |   |   |   |   |   |
| 19 | Is16              | wzi-4              | 82.5      | 82.5      | 82.5      |   |   |   |   |   |   |   |   |
| 20 | Is17              | wzi-3              | 84        | 84        | 84        |   |   |   |   |   |   |   |   |
| 21 | Is17              | wzi-4              | 84        | 84        | 84        |   |   |   |   |   |   |   |   |
| 22 | Is19              | wzi-3              | 84        | 84        | 84        |   |   |   |   |   |   |   |   |
| 23 | Is19              | wzi-4              | 84        | 84        | 84        |   |   |   |   |   |   |   |   |
| 24 | Is02              | wzi-3              | 84        | 84        | 84        |   |   |   |   |   |   |   |   |
| 25 | Is02              | wzi-4              | 84        | 84        | 84        |   |   |   |   |   |   |   |   |
| 26 | Is20              | wzi-3              | 84        | 84        | 84        |   |   |   |   |   |   |   |   |
| 27 | Is20              | wzi-4              | 82.5      | 82.5      | 82.5      |   |   |   |   |   |   |   |   |
| 28 | Is21              | wzi-3              | 84        | 84        | 84        |   |   |   |   |   |   |   |   |

HRM\_temperatures | Isolates\_metadata | Background\_strains | HELP\_notes

The input file is a xls spreadsheet.

The template is available here:

[https://skynet.unimi.it/wp-content/uploads/MeltingPlot/MeltingPlot\\_Template.xls](https://skynet.unimi.it/wp-content/uploads/MeltingPlot/MeltingPlot_Template.xls).

The example file used in the work is available here:

[https://skynet.unimi.it/wp-content/uploads/MeltingPlot/files\\_supplementary\\_material/big\\_example.xls](https://skynet.unimi.it/wp-content/uploads/MeltingPlot/files_supplementary_material/big_example.xls)

Other Example files and templates with reference isolates temperatures from different instrument models are available at the tool's website:

<https://skynet.unimi.it/index.php/tools/meltingplot/>

Each xls input file contains 4 sheets: "HRM\_temperatures", "Isolates\_metatada", "Reference\_isolates", "HELP\_notes".

- **HRM\_temperatures**

The user needs to add here the temperatures measured by the PCR-HRM experiments performed on the isolates. Each row contains the temperatures relative

to one isolate and one primer set. (when multiple primer sets are used for the PCR-HRM experiment, multiple rows per isolate should be used).

The fields are:

- *ID\_isolate*: unique ID for each isolate.
- *Primer\_set*: name of the primer set used for the single experiment.
- *T1,T2,T3...*: measured melting temperatures. The temperatures from each technical replicate (T1, T2, T3, ...) of the single experiment should be reported. If a different number of replicates were performed, the user can add or remove columns. The number of replicates must always be specified before launching the analysis.

- ***Isolates\_metatada***

In this sheet the user can specify from which patient each isolate was collected.

The fields are:

- *ID\_isolate*: unique ID for each isolate. (must be the exactly the same ID reported in the *HRM\_temperature* sheet).
- *ID\_patient*: unique ID for each patient.
- *Date*: isolate collection date
- *Location*: location of the isolate collection (e.g ward)

- ***Reference\_isolates***

In the sheet the user can report the temperature and the information about the reference strains. The information provided here will be used to name the clusters.

The fields are:

- *ID\_isolate*: unique ID for each reference isolate.
- *Annotation*: characteristic feature of the reference isolate (e.g. Sequence type). This information will be used to name the cluster during the HRM-based clustering/typing of the isolates
- *T1,T2,T3...*: measured melting temperatures. The temperatures from each technical replicate of the single experiment should be reported. If a different number of replicates were performed, the user can add or remove columns. The number of replicates must always be specified before launching the analysis.

- ***HELP\_notes***

This sheet contains a summary of the rules and information necessary to fill the file.

# Output files

Click on the file name to read the output descriptions (or see below). All the output images refer to the example dataset used in the work. The example dataset file is available here: [https://skynet.unimi.it/wp-content/uploads/MeltingPlot/files\\_supplementary\\_material/big\\_example.xls](https://skynet.unimi.it/wp-content/uploads/MeltingPlot/files_supplementary_material/big_example.xls)

The graphical outputs are:

1. HRM-based clustering/typing

[1a\) Isolates graph](#)

[1b\) Isolates heatmap](#)

2. Prevalence analysis

[2a\) Isolates location \(daily\)](#)

[2b\) Isolates location \(monthly\)](#)

[2c\) Positivization location \(daily\)](#)

[2d\) Positivization location \(monthly\)](#)

[2e\) Positivization global \(daily\)](#)

[2f\) Positivization global \(monthly\)](#)

3. Transmission analysis

[3a\) Patients timeline](#)

[3b\) Patients graph](#)

The tabular outputs are:

[Isolates cluster table](#)

[Isolates cluster and patients table](#)

# 1. HRM-based clustering/typing

## 1a) Isolates graph

Each vertex represents an isolate. The isolates are clustered on the basis of the edge betweenness as described in the clustering algorithm section of this document. When the reference isolates are provided, the clusters take the name of the reference isolates that they may contain. Vertices sizes depend on the betweenness values and edges thickness depends on the edge betweenness values. As a result, smaller vertices indicate uncertain clustering of the isolates and thinner edges connect isolates that unlikely belong to the same cluster.

High resolution file:

[https://skynet.unimi.it/wp-content/uploads/MeltingPlot/files\\_supplementary\\_material/pdf\\_1a\\_big\\_isolates\\_graph.pdf](https://skynet.unimi.it/wp-content/uploads/MeltingPlot/files_supplementary_material/pdf_1a_big_isolates_graph.pdf)

### 1a) HRM-based clustering/typing: isolates graph

smaller nodes = uncertain clustering, thinner link = uncertain connection

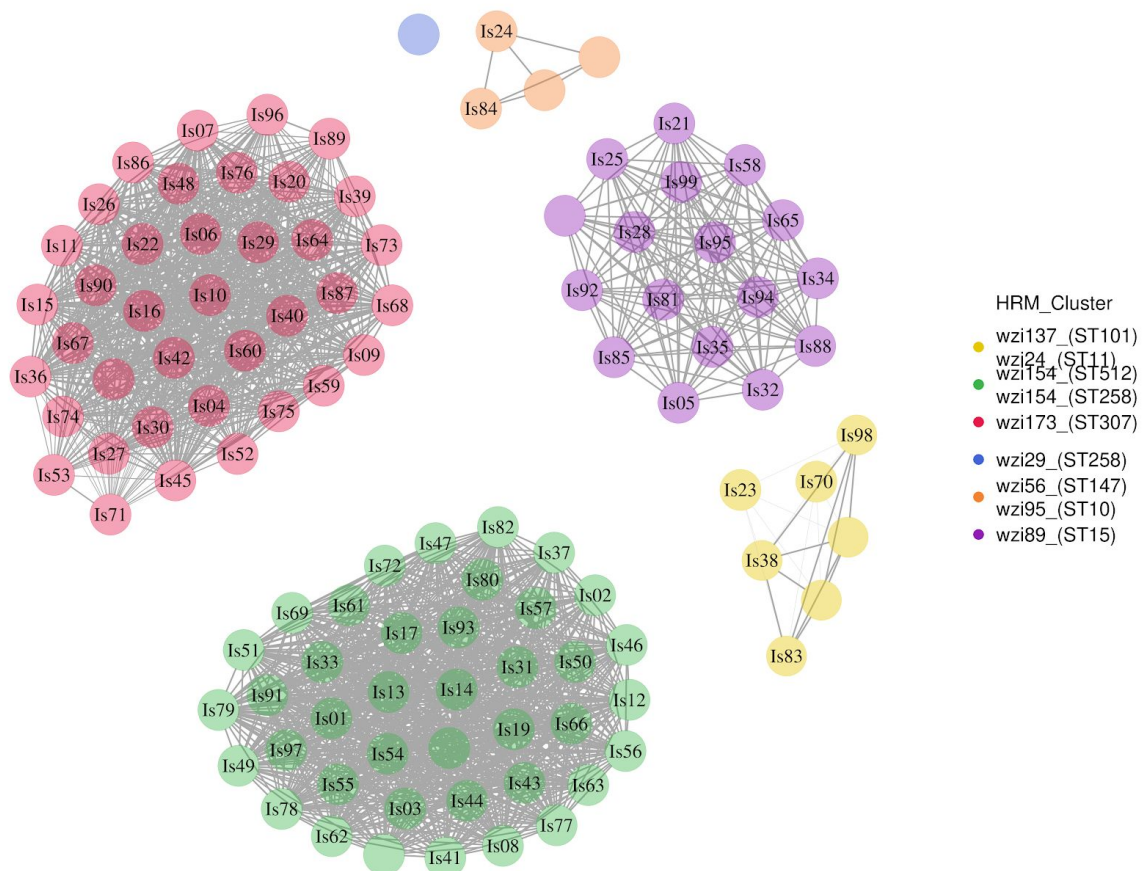

## 1b) Isolates heatmap

The heatmap shows all the melting temperatures provided and groups the isolates by clusters. The reference strains' names are gray to easily distinguish them from the other isolates.

High resolution complete file:

[https://skynet.unimi.it/wp-content/uploads/MeltingPlot/files\\_supplementary\\_material/pdf\\_1b\\_big\\_isolates\\_heatmap.pdf](https://skynet.unimi.it/wp-content/uploads/MeltingPlot/files_supplementary_material/pdf_1b_big_isolates_heatmap.pdf)

### 1b) HRM-based clustering/typing: isolates heatmap

Reference strains' names are gray

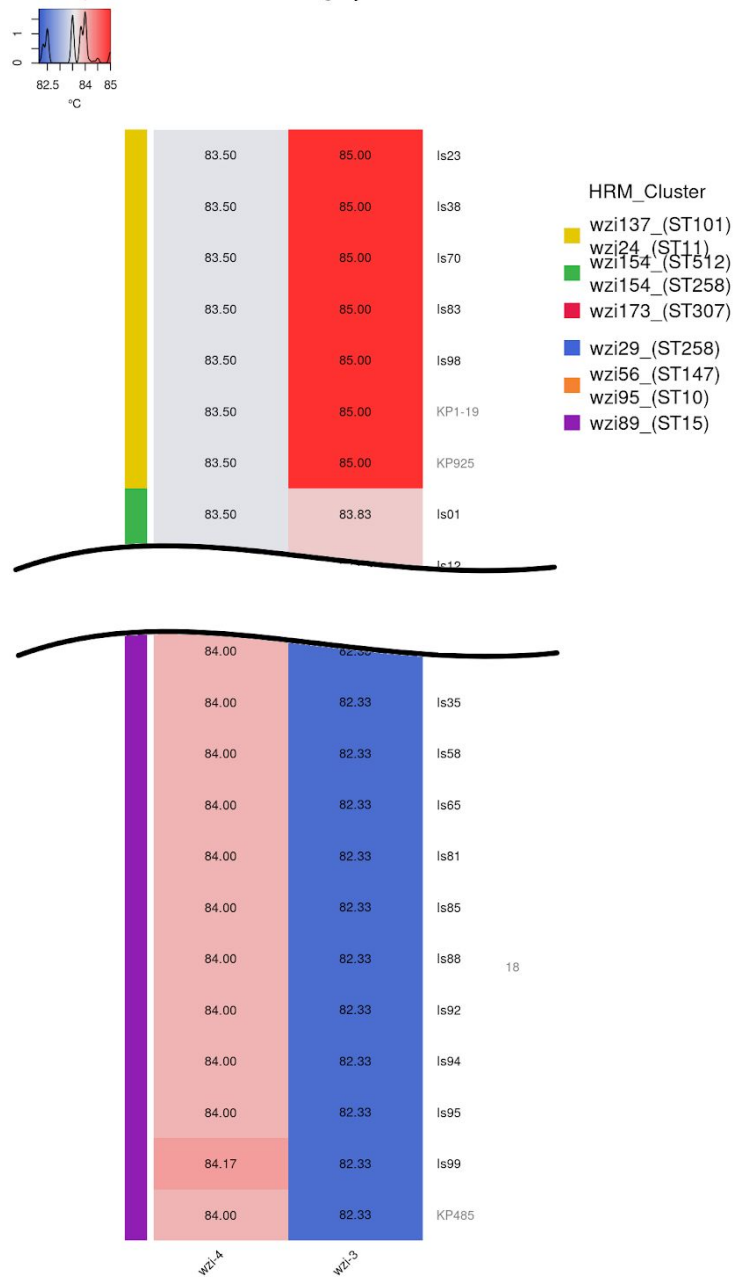

## 2. Prevalence analysis

### 2a) Isolates location (daily)

The bar charts show the location and the collection day for each isolate. The position on the x axis corresponds to the isolation date. The y axis is divided in panels that correspond to the locations (wards) provided, a color is assigned to each location and it is shown in the panel's title band.

High resolution file:

[https://skynet.unimi.it/wp-content/uploads/MeltingPlot/files\\_supplementary\\_material/pdf\\_2a\\_big\\_isolates\\_location\\_daily.pdf](https://skynet.unimi.it/wp-content/uploads/MeltingPlot/files_supplementary_material/pdf_2a_big_isolates_location_daily.pdf)

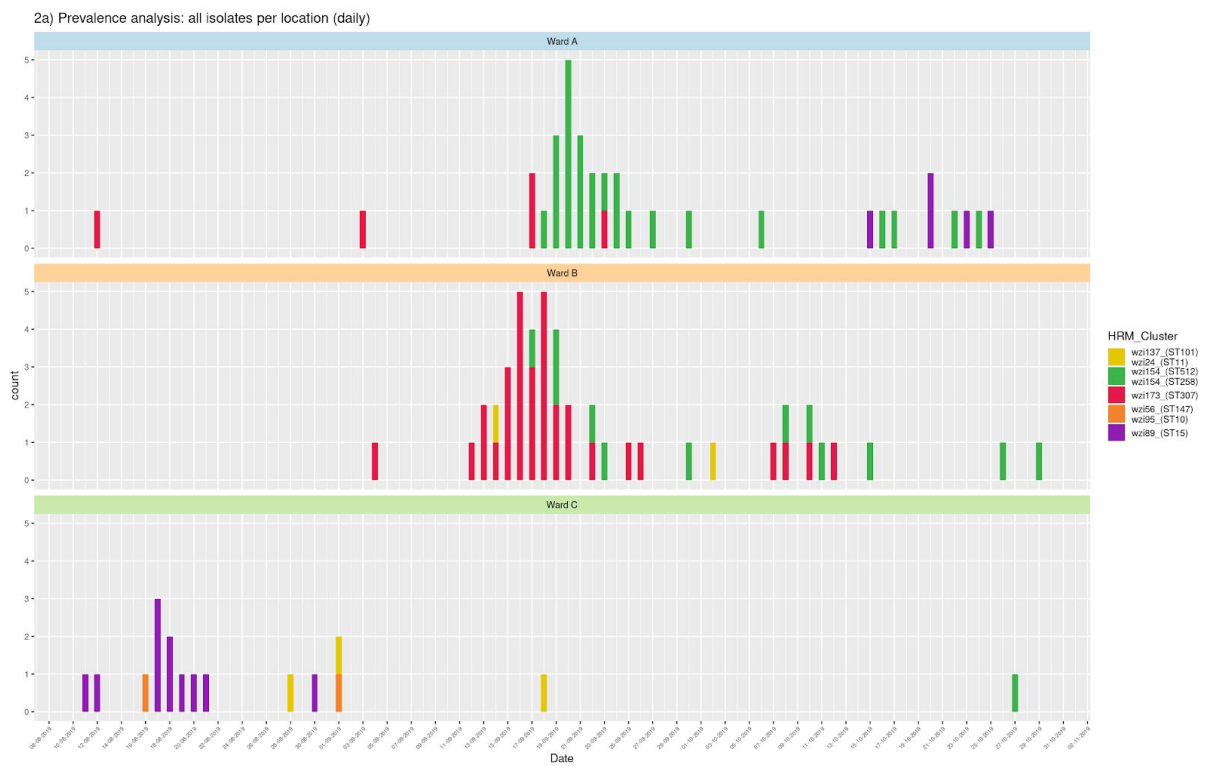



## 2b) Isolates location (monthly)

The bar charts show the location and the collection month for each isolate. This plot is created only if the collection date range is above 45 days. The position on the x axis corresponds to the isolation month. The y axis is divided in panels that correspond to the locations (wards) provided, a color is assigned to each location and it is shown in the panel's title band.

High resolution file:

[https://skynet.unimi.it/wp-content/uploads/MeltingPlot/files\\_supplementary\\_material/pdf\\_2b\\_big\\_isolates\\_location\\_monthly.pdf](https://skynet.unimi.it/wp-content/uploads/MeltingPlot/files_supplementary_material/pdf_2b_big_isolates_location_monthly.pdf)

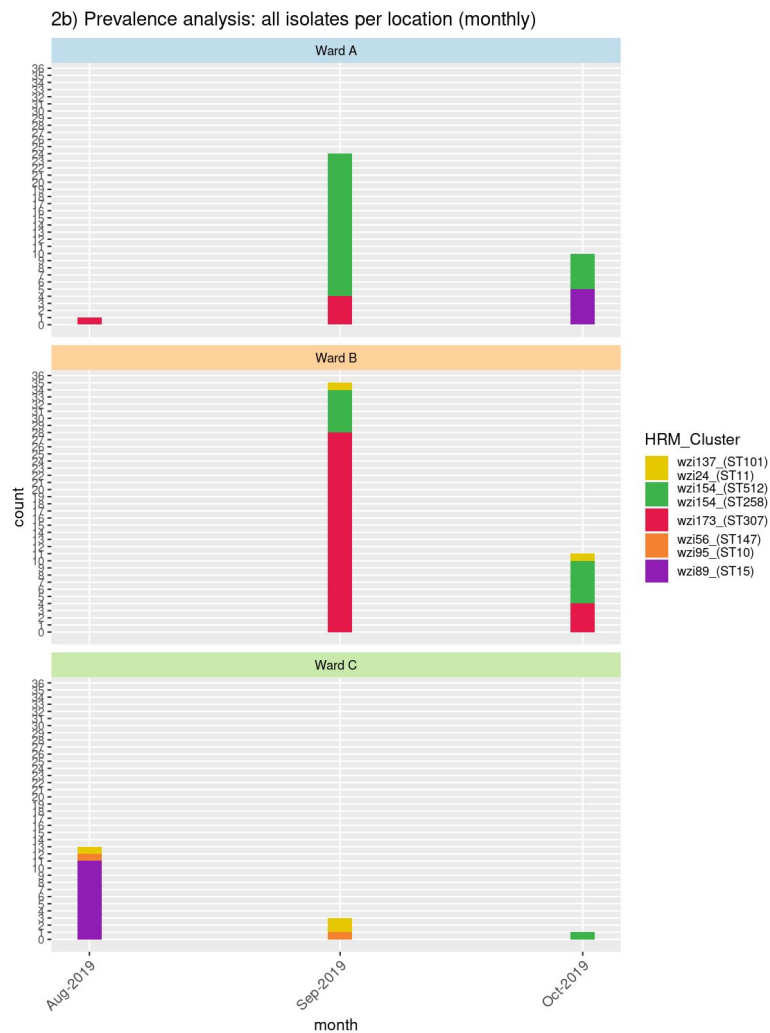

## 2c) Positivizations location (daily)

The bar charts show the location and the collection day for each positivization. A positivization corresponds to the first time a patient is found positive to an isolate of a cluster. When two isolates of different clusters are isolated from a patient, that patient will have two positivization events (one per cluster). The position on the x axis corresponds to the positivization day. The y axis is divided in panels that correspond to the locations (wards) provided, a color is assigned to each location and its shown in the panel's title band.

High resolution file:

[https://skynet.unimi.it/wp-content/uploads/MeltingPlot/files\\_supplementary\\_material/pdf\\_2c\\_big\\_positivization\\_location\\_daily.pdf](https://skynet.unimi.it/wp-content/uploads/MeltingPlot/files_supplementary_material/pdf_2c_big_positivization_location_daily.pdf)

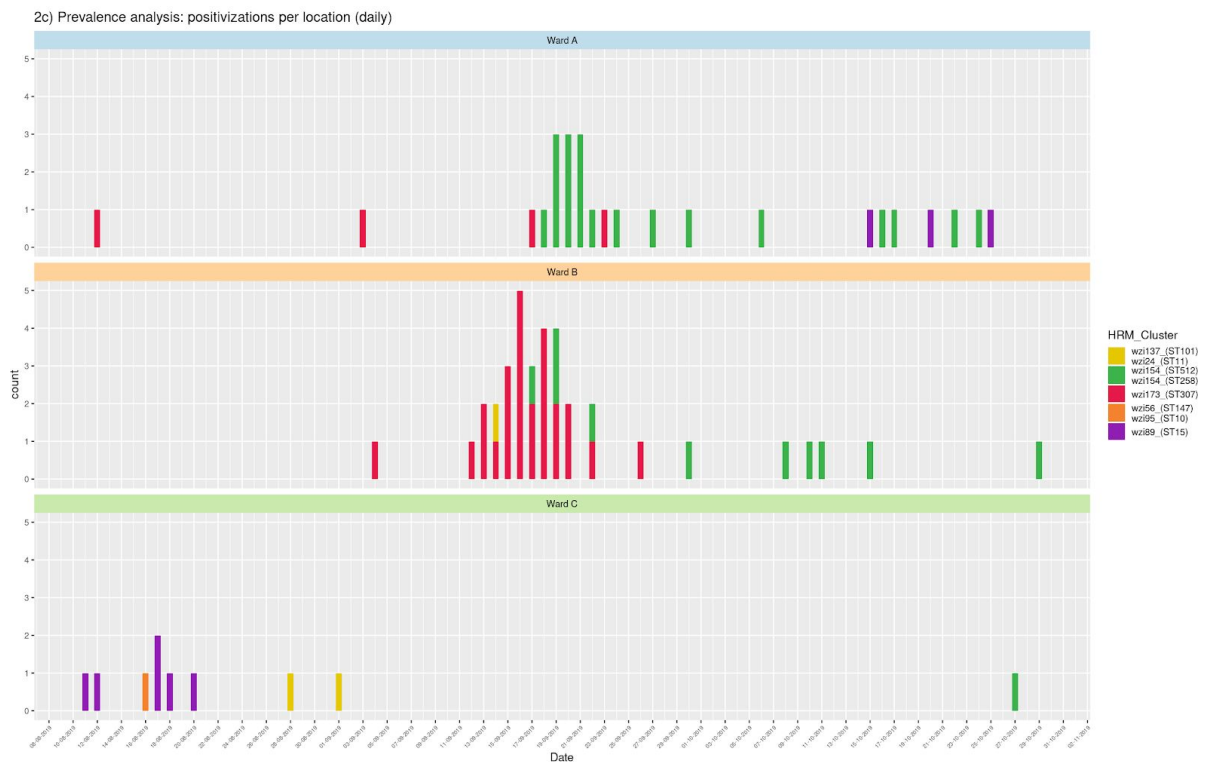

## 2d) Positivizations location (monthly)

The bar charts show the location and the collection month for each positivization. This plot is created only if the collection date range is above 45 days. A positivization corresponds to the first time a patient is found positive to an isolate of a cluster. When two isolates of different clusters are isolated from a patient, that patient will have two positivization events (one per cluster). The position on the x axis corresponds to the positivization month. The y axis is divided in panels that correspond to the locations (wards) provided, a color is assigned to each location and it is shown in the panel's title band.

High resolution file:

[https://skynet.unimi.it/wp-content/uploads/MeltingPlot/files\\_supplementary\\_material/pdf\\_2d\\_big\\_positivization\\_location\\_monthly.pdf](https://skynet.unimi.it/wp-content/uploads/MeltingPlot/files_supplementary_material/pdf_2d_big_positivization_location_monthly.pdf)

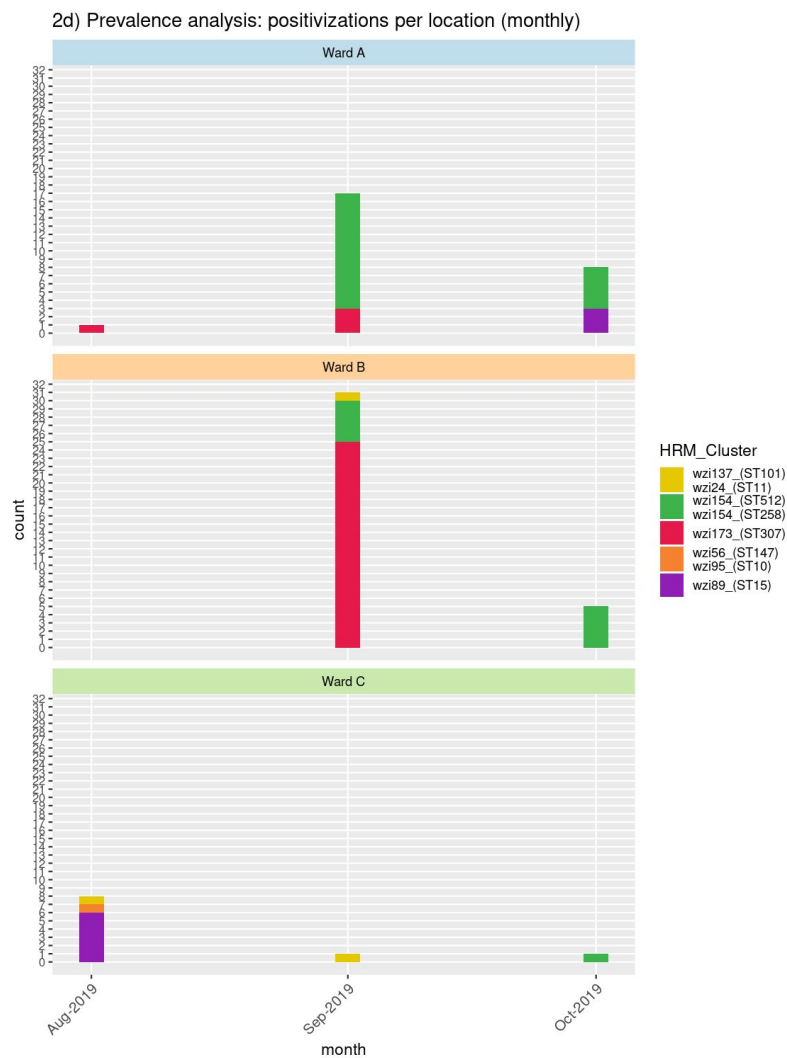



## 2f) Positivizations global (monthly)

The bar charts show the location and the collection month for each positivization in all the locations (wards) combined. This plot is created only if the collection date range is above 45 days. A positivization corresponds to the first time a patient is found positive to an isolate of a cluster. When two isolates of different clusters are isolated from a patient, that patient will have two positivization events (one per cluster). The position on the x axis corresponds to the positivization month.

High resolution file:

[https://skynet.unimi.it/wp-content/uploads/MeltingPlot/files\\_supplementary\\_material/pdf\\_2f\\_big\\_positivization\\_global\\_monthly.pdf](https://skynet.unimi.it/wp-content/uploads/MeltingPlot/files_supplementary_material/pdf_2f_big_positivization_global_monthly.pdf)

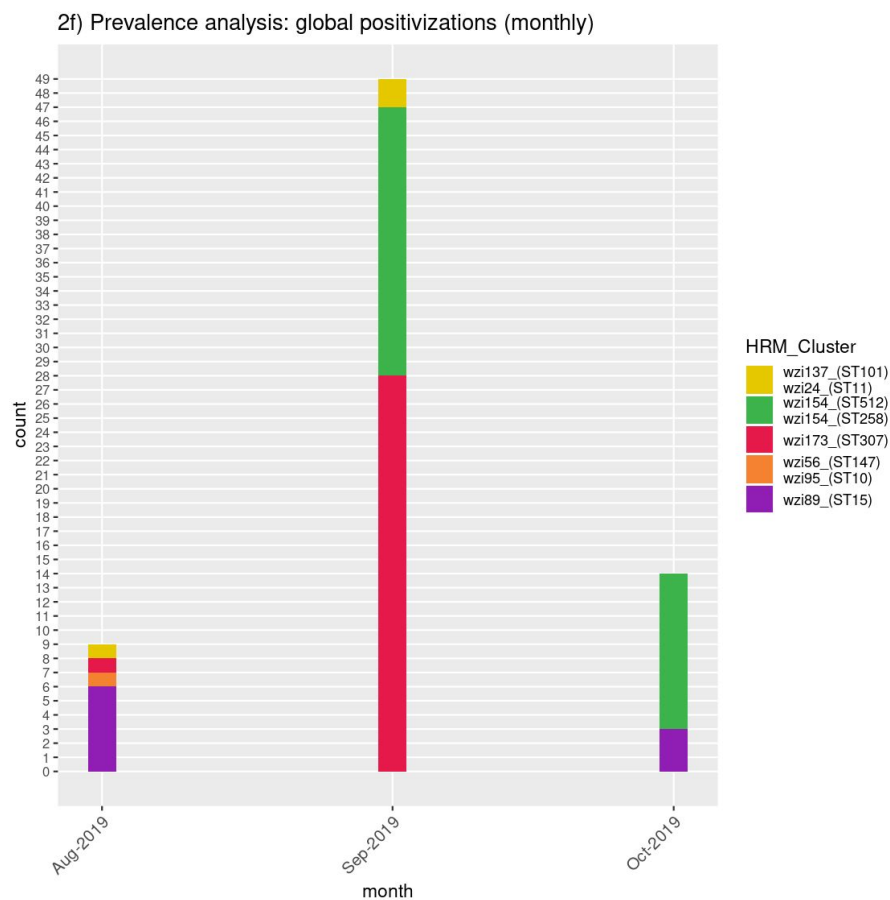

# Transmission analysis

## 3a) Patients timeline

In this patients' timeline, each row refers to a patient and symbols represent the isolates. The shape of the symbol corresponds to the patient location (ward) at the time of isolate collection, the color represents the isolate cluster. Larger symbols represent positivizations: the first time a patient is found positive to an isolate of a cluster. If two or more isolates of the same cluster are isolated from a patient, that patient will have a first larger symbol (representing the positivization) and other smaller symbols (the other isolations). When two isolates of different clusters are isolated from the same patient, that patient will have two positivization and thus two larger symbols, one per cluster. In the plot, patients are sorted on the basis of the first isolation date.

High resolution file:

[https://skynet.unimi.it/wp-content/uploads/MeltingPlot/files\\_supplementary\\_material/pdf\\_3a\\_big\\_patients\\_timeline.pdf](https://skynet.unimi.it/wp-content/uploads/MeltingPlot/files_supplementary_material/pdf_3a_big_patients_timeline.pdf)

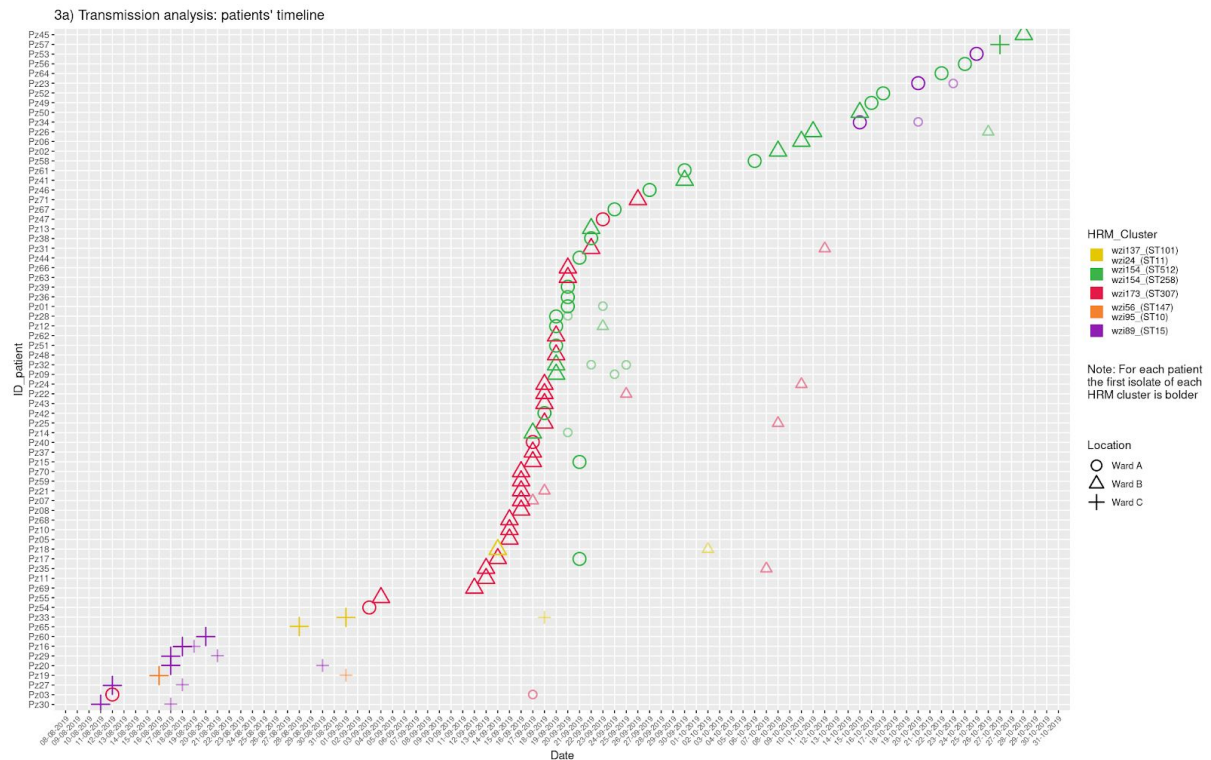

### 3b) Patient-to-patient graph

In this graph each vertex represent a patient and two vertices are connected if isolates of the same cluster are isolated from the two patients. Each patient is represented by a pie chart to show the visited locations (wards). The edges are thicker when the isolates of the same cluster were collected in the same location (ward) in less than 7 days (this amount of days can be set by the user, the default is 7).

High resolution file:

[https://skynet.unimi.it/wp-content/uploads/MeltingPlot/files\\_supplementary\\_material/pdf\\_3b\\_big\\_patients\\_graph.pdf](https://skynet.unimi.it/wp-content/uploads/MeltingPlot/files_supplementary_material/pdf_3b_big_patients_graph.pdf)

### 3b) Transmission analysis: patient-to-patient graph

Note: links of connections occurred within 7 days are bolder

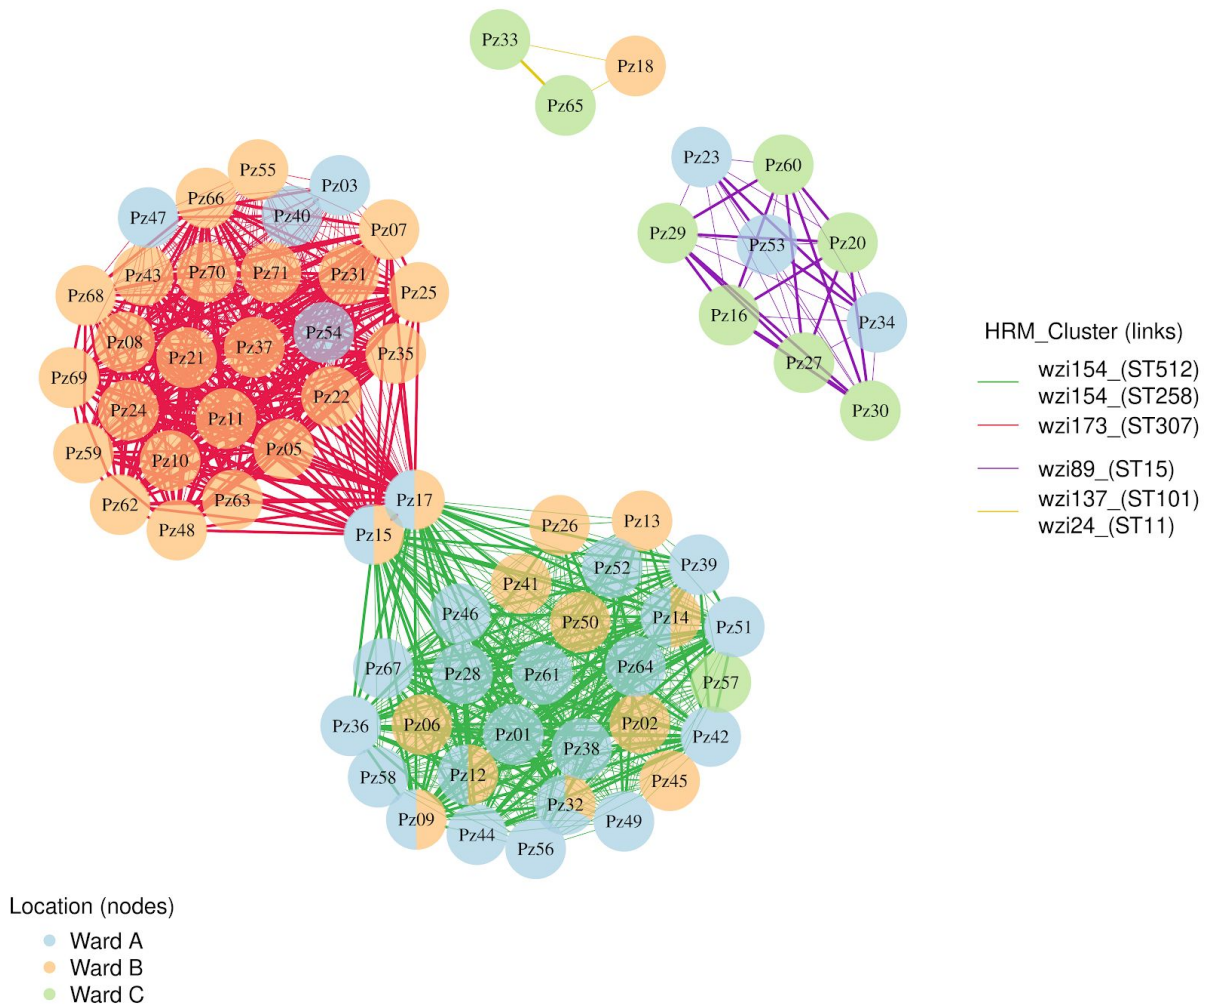



## Tabular outputs

### Isolates cluster table

This xls spreadsheet lists all the isolates, their HRM cluster, the betweenness values and cluster colors in hexadecimal code. Data and colors are those used to build the isolate graph produced in the HRM-based clustering/typing analysis.

Complete xls file:

[https://skynet.unimi.it/wp-content/uploads/MeltingPlot/files\\_supplementary\\_material/table\\_big\\_clusters.xls](https://skynet.unimi.it/wp-content/uploads/MeltingPlot/files_supplementary_material/table_big_clusters.xls)

|    | A            | B                               | C                 | D          |
|----|--------------|---------------------------------|-------------------|------------|
| 1  | ID_isolate   | HRM_Cluster                     | Betweenness       | color_hexa |
| 2  | 49BG         | wzi56_(ST147) & wzi95_(ST10)    |                   | 0 #f58231  |
| 3  | 52BG         | wzi56_(ST147) & wzi95_(ST10)    |                   | 0 #f58231  |
| 4  | BG-Kpn-25-18 | wzi154_(ST512) & wzi154_(ST258) |                   | 0 #3cb44b  |
| 5  | Is01         | wzi154_(ST512) & wzi154_(ST258) |                   | 0 #3cb44b  |
| 6  | Is02         | wzi154_(ST512) & wzi154_(ST258) |                   | 0 #3cb44b  |
| 7  | Is03         | wzi154_(ST512) & wzi154_(ST258) |                   | 0 #3cb44b  |
| 8  | Is04         | wzi173_(ST307)                  | 0.000322765947766 | #e6194B    |
| 9  | Is05         | wzi89_(ST15)                    |                   | 0 #911eb4  |
| 10 | Is06         | wzi173_(ST307)                  | 0.000322765947766 | #e6194B    |
| 11 | Is07         | wzi173_(ST307)                  | 0.000322765947766 | #e6194B    |
| 12 | Is08         | wzi154_(ST512) & wzi154_(ST258) |                   | 0 #3cb44b  |
| 13 | Is09         | wzi173_(ST307)                  | 0.000322765947766 | #e6194B    |
| 14 | Is10         | wzi173_(ST307)                  | 0.000322765947766 | #e6194B    |
| 15 | Is11         | wzi173_(ST307)                  | 0.000322765947766 | #e6194B    |
| 16 | Is12         | wzi154_(ST512) & wzi154_(ST258) |                   | 0 #3cb44b  |
| 17 | Is13         | wzi154_(ST512) & wzi154_(ST258) |                   | 0 #3cb44b  |
| 18 | Is14         | wzi154_(ST512) & wzi154_(ST258) |                   | 0 #3cb44b  |
| 19 | Is15         | wzi173_(ST307)                  | 0.000322765947766 | #e6194B    |
| 20 | Is16         | wzi173_(ST307)                  | 0.000322765947766 | #e6194B    |
| 21 | Is17         | wzi154_(ST512) & wzi154_(ST258) |                   | 0 #3cb44b  |
| 22 | Is19         | wzi154_(ST512) & wzi154_(ST258) |                   | 0 #3cb44b  |
| 23 | Is20         | wzi173_(ST307)                  | 0.000322765947766 | #e6194B    |
| 24 | Is21         | wzi89_(ST15)                    |                   | 0 #911eb4  |
| 25 | Is22         | wzi173_(ST307)                  | 0.000322765947766 | #e6194B    |



## Isolates cluster and patients table

This xls spreadsheet lists all the isolates and their relations to patients. Patient's ID, isolation data, location (ward), HRM cluster, betweenness values and cluster color (in hexadecimal code) are reported for every isolate. This information is used in the Prevalence analysis and the Transmission analysis.

Complete xls file:

[https://skynet.unimi.it/wp-content/uploads/MeltingPlot/files\\_supplementary\\_material/table\\_big\\_clusters\\_patients.xls](https://skynet.unimi.it/wp-content/uploads/MeltingPlot/files_supplementary_material/table_big_clusters_patients.xls)

|    | A          | B          | C          | D        | E                               | F           | G          |
|----|------------|------------|------------|----------|---------------------------------|-------------|------------|
| 1  | ID_isolate | ID_patient | Date       | Location | HRM_Cluster                     | Betweenness | color_hexa |
| 2  | Is01       | Pz01       | 9/20/2019  | Ward A   | wzi154_(ST512) & wzi154_(ST258) | 0           | #3cb44b    |
| 3  | Is02       | Pz01       | 9/23/2019  | Ward A   | wzi154_(ST512) & wzi154_(ST258) | 0           | #3cb44b    |
| 4  | Is03       | Pz02       | 10/8/2019  | Ward B   | wzi154_(ST512) & wzi154_(ST258) | 0           | #3cb44b    |
| 5  | Is04       | Pz03       | 8/12/2019  | Ward A   | wzi173_(ST307)                  | 0.000322766 | #e6194B    |
| 6  | Is05       | Pz34       | 10/15/2019 | Ward A   | wzi89_(ST15)                    | 0           | #911eb4    |
| 7  | Is06       | Pz03       | 9/17/2019  | Ward A   | wzi173_(ST307)                  | 0.000322766 | #e6194B    |
| 8  | Is07       | Pz05       | 9/15/2019  | Ward B   | wzi173_(ST307)                  | 0.000322766 | #e6194B    |
| 9  | Is08       | Pz06       | 10/10/2019 | Ward B   | wzi154_(ST512) & wzi154_(ST258) | 0           | #3cb44b    |
| 10 | Is09       | Pz07       | 9/17/2019  | Ward B   | wzi173_(ST307)                  | 0.000322766 | #e6194B    |
| 11 | Is10       | Pz08       | 9/16/2019  | Ward B   | wzi173_(ST307)                  | 0.000322766 | #e6194B    |
| 12 | Is11       | Pz07       | 9/16/2019  | Ward B   | wzi173_(ST307)                  | 0.000322766 | #e6194B    |
| 13 | Is12       | Pz09       | 9/24/2019  | Ward A   | wzi154_(ST512) & wzi154_(ST258) | 0           | #3cb44b    |
| 14 | Is13       | Pz09       | 9/19/2019  | Ward B   | wzi154_(ST512) & wzi154_(ST258) | 0           | #3cb44b    |
| 15 | Is14       | Pz32       | 9/25/2019  | Ward A   | wzi154_(ST512) & wzi154_(ST258) | 0           | #3cb44b    |
| 16 | Is15       | Pz10       | 9/15/2019  | Ward B   | wzi173_(ST307)                  | 0.000322766 | #e6194B    |
| 17 | Is16       | Pz11       | 9/13/2019  | Ward B   | wzi173_(ST307)                  | 0.000322766 | #e6194B    |
| 18 | Is17       | Pz12       | 9/23/2019  | Ward B   | wzi154_(ST512) & wzi154_(ST258) | 0           | #3cb44b    |
| 19 | Is19       | Pz14       | 9/20/2019  | Ward A   | wzi154_(ST512) & wzi154_(ST258) | 0           | #3cb44b    |
| 20 | Is20       | Pz15       | 9/17/2019  | Ward B   | wzi173_(ST307)                  | 0.000322766 | #e6194B    |
| 21 | Is21       | Pz16       | 8/18/2019  | Ward C   | wzi89_(ST15)                    | 0           | #911eb4    |
| 22 | Is22       | Pz17       | 9/14/2019  | Ward B   | wzi173_(ST307)                  | 0.000322766 | #e6194B    |
| 23 | Is23       | Pz18       | 9/14/2019  | Ward B   | wzi137_(ST101) & wzi24_(ST11)   | 0           | #e6c800    |
| 24 | Is24       | Pz19       | 9/1/2019   | Ward C   | wzi56_(ST147) & wzi95_(ST10)    | 0           | #f58231    |

## References

- [1] M. Perini *et al.*, “EasyPrimer: user-friendly tool for pan-PCR/HRM primers design. Development of an HRM protocol on *wzi* gene for fast *Klebsiella pneumoniae* typing,” *Sci. Rep.*, vol. 10, no. 1, p. 1307, Jan. 2020, doi: 10.1038/s41598-020-57742-z.
- [2] M. E. J. Newman and M. Girvan, “Finding and evaluating community structure in networks,” *Physical Review E*, vol. 69, no. 2. 2004, doi: 10.1103/physreve.69.026113.
- [3] G. Csardi, T. Nepusz, and Others, “The igraph software package for complex network research,” *InterJournal, complex systems*, vol. 1695, no. 5, pp. 1–9, 2006, [Online]. Available: <http://igraph.org>.
